# Supplementary material for: The membrane domains of mammalian adenylyl cyclases are lipid receptors
Source: eLife. 2024 Nov 29;13:RP101483. doi: 10.7554/eLife.101483 (PMC11606603; doi:10.7554/eLife.101483)
Supplement: Figure 1—figure supplement 5—source data 1. [file elife-101483-fig1-figsupp5-data1.xlsx]

## Sheet: Figure 1-figure supplement 5
Figure 1-figure supplement 5
Hanes-Woolf plot				Michaelis-Menten
ATP (µM)	ATP/V (mAC3)			ATP (µM)	mAC3 activity (nmol cAMP/mg/min)
0				0
50	740.741			50	0.039	0.096
75	516.055			75	0.162	0.185	0.089
250	936.33			250	0.157	0.297	0.347
500	1359.93			500	0.336	0.476	0.291
750	1910.02			750	0.3	0.562	0.316
1000	2060.44			1000	0.472	0.526	0.458
ATP (µM)	ATP/V (mAC3 + 20µM Oleic acid)			ATP (µM)	mAC3 activity + 20µM Oleic acid (nmol cAMP/mg/min)
0				0
50	208.768			50		0.232	0.247
75	204.918			75		0.434	0.298
250	392.876			250	0.713	0.609	0.587
500	636.943			500	0.786	0.782	0.787
750	814.627			750	0.817	0.753	1.192
1000	941.563			1000	0.944	1.15619	1.086
