# Supplementary material for: The membrane domains of mammalian adenylyl cyclases are lipid receptors
Source: eLife. 2024 Nov 29;13:RP101483. doi: 10.7554/eLife.101483 (PMC11606603; doi:10.7554/eLife.101483)
Supplement: Figure 1—source data 1. [file elife-101483-fig1-data1.xlsx]

## Sheet: Figure 1
Fig. 1
Figure 1 A
mAC activity [%] (100% = 300nM Gsα stimulation); 1µg/assay fraction E concentration
	mAC3	mAC5
	283	81
	468	65
Figure 1 B
mAC activity [%] (100% = 300nM Gsα stimulation); 1µg/assay fraction E2 concentration
	mAC3	mAC5
	519	143
	303	48
Figure 1 D (left)
mAC3 activity [%] (100% = 300nM Gsα stimulation)
fatty acid (µM)	Oleic acid
0.5	100	100	100	100			100	100	100		100	100	100	100	100	100	100
1	112	130	95	111	132	139	103	106	87	105	91	64	97	132	107	78	118
3		142	123	105	126	135	132	145	150	98	158	97	204	183	141	120	160
6	117	169	119	129	122	166	169	118	97	105	118	165	187	204	128	209	143
10	271	191	212	139	175	284	260	266	166	106	156	151	142	280	178	252	181
20	341	237	237	181	452	464	265	265	137	226	348	429	323	430	264	322	395
mAC3 activity [%] (100% = 300nM Gsα stimulation)
fatty acid (µM)	Palmitic acid
0.5	100	100	100	100	100	100	100	100	100	100
1	166		87	118	83				122	108	118
3	122		136	114	107				116	126	125
6	107		129	73	158				259	145	118
10	188	339	112	94	165	197	126	128	237	338	172
20	279	341	182	165	224	164	153	126	243	263	138
mAC3 activity [%] (100% = 300nM Gsα stimulation)
fatty acid (µM)	Stearic acid
0.5	100	100	100	100	100	100
1	121	48		49	110	79
3	84	77		52	121	116
6	91	103		32	103	75
10	69	84	75.6436	71	80	79
20	114.564	83	67.9578	70	65	160
Figure 1 D (right)
mAC5 activity [%] (100% = 300nM Gsα stimulation)
fatty acid (µM)	Oleic acid
0.5	100	100	100	100	100	100	100
1	126	196		97.0528	115.163	78	64
3	110	142		91.1417	104.695	96	87
6	146	127		101	95	77	90
10	126	140	102	134	93
20	105	93	117	135	138
mAC5 activity [%] (100% = 300nM Gsα stimulation)
fatty acid (µM)	Palmitic acid
0.5	100	100	100	100	100	100
1	71				82.7488	110.703
3	66				80.2021	161.992
6	50				107.828	125.244
10	57	89	94	102.506
20	123	77	97	123.418
mAC5 activity [%] (100% = 300nM Gsα stimulation)
fatty acid (µM)	Stearic acid
0.5	100	100	100	100	100	100
1	134	72			82.7488	110.703
3		73			80.2021	161.992
6	124	75			107.828	125.244
10		73	93	77
20		79.8947	91	83
