# Supplementary material for: The membrane domains of mammalian adenylyl cyclases are lipid receptors
Source: eLife. 2024 Nov 29;13:RP101483. doi: 10.7554/eLife.101483 (PMC11606603; doi:10.7554/eLife.101483)
Supplement: Figure 2—source data 1. [file elife-101483-fig2-data1.xlsx]

## Sheet: Figure 2
Figure 2
Figure 2 (left)						Figure 2 (center)						Figure 2 (right)
activity (cAMP nmol/mg/min)						activity (cAMP nmol/mg/min)						(Gsα + oleic acid) / Gsα ratio
Gsα (nM)	mAC3					Gsα (nM)	mAC5					Gsα (nM)	mAC3
30	0.08	0.01	0.01			30	0.08	0.08				60	2.29559	2.09111	3.34688
60	0.068	0.028	0.017			60	0.102	0.15				100	5.98499	1.83872	2.8768
100	0.035	0.06	0.039			100	0.343	0.243				300	1.94353	3.49553	3.33715
300	0.222	0.173	0.179			300	0.851	0.93				450	3.11391	5.32524	3.23925
450	0.25	0.222	0.224			450	0.937	1.057				600	2.29142	3.36548	3.39816
600	0.36	0.32	0.383			600	1.172	1.35				800	2.46279	4.56401	3.55508
800	0.436	0.255	0.366			800	1.061	1.456				1000	2.43345	2.8974	4.37187
1000	0.423	0.498	0.396			1000	1.17436	1.496
activity (cAMP nmol/mg/min)						activity (cAMP nmol/mg/min)
Gsα (nM)	mAC3 + 20µM Oleic acid					Gsα (nM)	mAC5 + 20µM Oleic acid					(Gsα + oleic acid) / Gsα ratio
30	0.08	0.005	0.01			30	0.08	0.08				Gsα (nM)	mAC5
60	0.155	0.058	0.057			60	0.233	0.334				60	2.27103	2.22771
100	0.209	0.11	0.112			100	0.353	0.362				100	1.03079	1.48804
300	0.432	0.605	0.596			300	0.752	1.165				300	0.884318	1.25266
450	0.779	1.182	0.727			450	1.16	1.405				450	1.23815	1.32995
600	0.825	1.078	1.302			600	1.213	1.684				600	1.0352	1.24707
800	1.075	1.164	1.303			800	1.245	1.702				800	1.17328	1.16868
1000	1.029	1.444	1.731			1000	1.41519	1.818				1000	1.20508	1.21543
