# Supplementary material for: The membrane domains of mammalian adenylyl cyclases are lipid receptors
Source: eLife. 2024 Nov 29;13:RP101483. doi: 10.7554/eLife.101483 (PMC11606603; doi:10.7554/eLife.101483)
Supplement: Figure 3—source data 1. [file elife-101483-fig3-data1.xlsx]

## Sheet: Figure 1
Fig. 1
Figure 1 A
mAC activity [%] (100% = 300nM Gsα stimulation); 1µg/assay fraction E concentration
	mAC3	mAC5
	283	81
	468	65
Figure 1 B
mAC activity [%] (100% = 300nM Gsα stimulation); 1µg/assay fraction E2 concentration
	mAC3	mAC5
	519	143
	303	48
Figure 1 D (left)
mAC3 activity [%] (100% = 300nM Gsα stimulation)
fatty acid (µM)	Oleic acid
0.5	100	100	100	100			100	100	100		100	100	100	100	100	100	100
1	112	130	95	111	132	139	103	106	87	105	91	64	97	132	107	78	118
3		142	123	105	126	135	132	145	150	98	158	97	204	183	141	120	160
6	117	169	119	129	122	166	169	118	97	105	118	165	187	204	128	209	143
10	271	191	212	139	175	284	260	266	166	106	156	151	142	280	178	252	181
20	341	237	237	181	452	464	265	265	137	226	348	429	323	430	264	322	395
mAC3 activity [%] (100% = 300nM Gsα stimulation)
fatty acid (µM)	Palmitic acid
0.5	100	100	100	100	100	100	100	100	100	100
1	166		87	118	83				122	108	118
3	122		136	114	107				116	126	125
6	107		129	73	158				259	145	118
10	188	339	112	94	165	197	126	128	237	338	172
20	279	341	182	165	224	164	153	126	243	263	138
mAC3 activity [%] (100% = 300nM Gsα stimulation)
fatty acid (µM)	Stearic acid
0.5	100	100	100	100	100	100
1	121	48		49	110	79
3	84	77		52	121	116
6	91	103		32	103	75
10	69	84	75.6436	71	80	79
20	114.564	83	67.9578	70	65	160
Figure 1 D (right)
mAC5 activity [%] (100% = 300nM Gsα stimulation)
fatty acid (µM)	Oleic acid
0.5	100	100	100	100	100	100	100
1	126	196		97.0528	115.163	78	64
3	110	142		91.1417	104.695	96	87
6	146	127		101	95	77	90
10	126	140	102	134	93
20	105	93	117	135	138
mAC5 activity [%] (100% = 300nM Gsα stimulation)
fatty acid (µM)	Palmitic acid
0.5	100	100	100	100	100	100
1	71				82.7488	110.703
3	66				80.2021	161.992
6	50				107.828	125.244
10	57	89	94	102.506
20	123	77	97	123.418
mAC5 activity [%] (100% = 300nM Gsα stimulation)
fatty acid (µM)	Stearic acid
0.5	100	100	100	100	100	100
1	134	72			82.7488	110.703
3		73			80.2021	161.992
6	124	75			107.828	125.244
10		73	93	77
20		79.8947	91	83

## Sheet: Figure 1-figure supplement 4
Figure 1-figure supplement 4
mAC3 activity (cAMP nmol/mg); stimulated by 300nM Gsα
time (min)	mAC3
0	0
3	1.01	0.205
6	1.097	0.64
10	1.729	1.074
15	2.286	1.596
20	2.512	4.823
25	2.834	4.253
mAC3 activity (cAMP nmol/mg); stimulated by 300nM Gsα + 20µM Oleic acid
time (min)	mAC3
0	0
3	2.601	2.019
6	2.734	2.75
10	3.46
15	4.543	5.759
20	6.22	8.564
25	9.573	11.033

## Sheet: Figure 1-figure supplement 5
Figure 1-figure supplement 5
Hanes-Woolf plot				Michaelis-Menten
ATP (µM)	ATP/V (mAC3)			ATP (µM)	mAC3 activity (nmol cAMP/mg/min)
0				0
50	740.741			50	0.039	0.096
75	516.055			75	0.162	0.185	0.089
250	936.33			250	0.157	0.297	0.347
500	1359.93			500	0.336	0.476	0.291
750	1910.02			750	0.3	0.562	0.316
1000	2060.44			1000	0.472	0.526	0.458
ATP (µM)	ATP/V (mAC3 + 20µM Oleic acid)			ATP (µM)	mAC3 activity + 20µM Oleic acid (nmol cAMP/mg/min)
0				0
50	208.768			50		0.232	0.247
75	204.918			75		0.434	0.298
250	392.876			250	0.713	0.609	0.587
500	636.943			500	0.786	0.782	0.787
750	814.627			750	0.817	0.753	1.192
1000	941.563			1000	0.944	1.15619	1.086

## Sheet: Figure 1-figure supplement 6
Figure 1-figure supplement 6
AC activity (%); stimulated by 300nM Gsα
Oleic acid (µM)	mAC1-C1/mAC2-C2
0.3	100	100	100
1	93	84	72
3	77	90	82
6	78	77	84
10	68	70	67
20	74	77	65

## Sheet: Figure 2
Figure 2
Figure 2 (left)						Figure 2 (center)						Figure 2 (right)
activity (cAMP nmol/mg/min)						activity (cAMP nmol/mg/min)						(Gsα + oleic acid) / Gsα ratio
Gsα (nM)	mAC3					Gsα (nM)	mAC5					Gsα (nM)	mAC3
30	0.08	0.01	0.01			30	0.08	0.08				60	2.29559	2.09111	3.34688
60	0.068	0.028	0.017			60	0.102	0.15				100	5.98499	1.83872	2.8768
100	0.035	0.06	0.039			100	0.343	0.243				300	1.94353	3.49553	3.33715
300	0.222	0.173	0.179			300	0.851	0.93				450	3.11391	5.32524	3.23925
450	0.25	0.222	0.224			450	0.937	1.057				600	2.29142	3.36548	3.39816
600	0.36	0.32	0.383			600	1.172	1.35				800	2.46279	4.56401	3.55508
800	0.436	0.255	0.366			800	1.061	1.456				1000	2.43345	2.8974	4.37187
1000	0.423	0.498	0.396			1000	1.17436	1.496
activity (cAMP nmol/mg/min)						activity (cAMP nmol/mg/min)
Gsα (nM)	mAC3 + 20µM Oleic acid					Gsα (nM)	mAC5 + 20µM Oleic acid					(Gsα + oleic acid) / Gsα ratio
30	0.08	0.005	0.01			30	0.08	0.08				Gsα (nM)	mAC5
60	0.155	0.058	0.057			60	0.233	0.334				60	2.27103	2.22771
100	0.209	0.11	0.112			100	0.353	0.362				100	1.03079	1.48804
300	0.432	0.605	0.596			300	0.752	1.165				300	0.884318	1.25266
450	0.779	1.182	0.727			450	1.16	1.405				450	1.23815	1.32995
600	0.825	1.078	1.302			600	1.213	1.684				600	1.0352	1.24707
800	1.075	1.164	1.303			800	1.245	1.702				800	1.17328	1.16868
1000	1.029	1.444	1.731			1000	1.41519	1.818				1000	1.20508	1.21543

## Sheet: Figure 3
Figure 3
mAC3 activity [%] (100% = 300nM Gsα stimulation); 20µM fatty acid concentration
Lauric	Myristic	Myristoleic	Palmitic	Palmitoleic	Stearic	9-HSA	Oleic	Triolein	2-Oleoylglycerol	Elaidic	cis-Vaccenic	Oleamide	Me-Oleate	Octadecane	Octadecane-(COOH)2	Linoleic	Linolenic	Arachidonic	EPA
117	90	82	279	248	114.564	104	341	95.8091	71.7231	437	429	238	141	67	104	376	177	115	169
189	108	156	341	259	83	110	237			276	498	301	89.8668	79	106	503	241	168	200
186	224	95	182	116	67.9578		237			279	460	167			66	335	105	182	266
84	226		165	136	70		181			778	363	90				235	288	127	160
			224	292	65		452			673	411	168.194				456	273
			164	151	160		464			221		154					159
			153	133			265			437		144
			126				265					201
			243				137
			263				226
			138				348
							429
							323
							430
							264
							322
							395
							298
							341
							532
							253
							428
							297

## Sheet: Figure 4
Figure 4
AC activity (%); 100%= 2.5µM Isoproterenol stimulation
Oleic acid (µM)	HEK-mAC3
0.001	100	100	100	100	100	100	100	100	100	100	100	100	100
0.01							132			100		105
0.03							102			145		87
0.06							103			118		89
0.1							118	127	150	122		108
0.3								130	163
0.5	140	92
0.6							101	113	161	135		121
1	152	114	158	176	139	123		120	184	106
3	190	109	191	198	119	107
6	178	111	149	195	140	108	115	126	178	112		146
10	199	123	137	198	118	119
20	178	136					136	96	201	147	164	163	150
50				187	186	134
AC activity (%); 100%= 2.5µM Isoproterenol stimulation
Oleic acid (µM)	HEK-mAC5
20	107	100	135

## Sheet: Figure 4-figure supplement 1
Figure 4-figure supplement 1
cAMP formation (%)
Isoproterenol (µM)	HEK293-mAC3
0.01	100	100	100
0.1			160
0.5			125
1	80	74	440
2.5	729	899	418
10	850	825	347
100	664	861

## Sheet: Figure 5
Figure 5
Figure 5 A										Figure 5 B
mAC activity [%] (100% = 300nM Gsα stimulation); 20µM Oleic acid concentration										activity [%] (100% = 300nM Gsα stimulation)
mAC1	mAC2	mAC3	mAC4	mAC5	mAC6	mAC7	mAC8	mAC9		Oleic acid (µM)	mAC2
75	196	341	92	105	92	160	134	181.746		0.3	100	100	100	100	100	100	100
44	228	237	64	93	80	315	139	405.46		1	98	100	116.946				86.6241
53	168	237	100	117	133	456		145.967		3	82	99	116.404				106.721
97	252	181	72	135		247		346.678		6	120	95	119.011		162	109.973	86.7599
68.0697	212	452		138		135		311		10	157	167	142	171	162	123	123
	173	464		161		250		255.138		20	196	228	168	252	212	173	181
	181	265		84		134		274.478
		265						276
		137						250.812		activity [%] (100% = 300nM Gsα stimulation)
		226						217.882		Oleic acid (µM)	mAC7
		348						184.806		0.3	100	100	100	100	100	100	100
		429						255.138		1	51	161	134	148	79	102	135
		323						342.385		3	77	199	127	215	64	110	62
		298						164		6	161	180		113	95	227	58
		430						447		10	114	257	315	204	115	147
		264								20	160	315	456	247	135	250	134
		322
		395
		341								activity [%] (100% = 300nM Gsα stimulation)
		532								Oleic acid (µM)	mAC9
		253								0.3	100	100	100	100	100	100	100	100	100	100	100
		428								1	115.024	88.1834	114.341	100.1	127.56	107.082	128.251	111.522	116.201	179.231	108.752	107.082		116	154
		297								3		59.0668	150.293	151.49	140.098	125.604	141.557	129.889	134.351	178.987	111.151	125.604		142	226
										6	144.921	157.549	176.953	138.334	151.883	237.827	151.212	215.669	161.941	129.566	178.845	237.827		137	173
										10	316.495	79.7108	312.059	189.114	169	180.889	216.348	203	202.436	200.479	171.191	180.889	259.025	140	418
										20	181.746	405.46	145.967	346.678	311	255.138	274.478	276	250.812	217.882	184.806	255.138	342.385	164	447
Figure 5 C
mAC activity [%] (100% = 300nM Gsα stimulation); 20µM fatty acid concentration
mAC2			mAC7
Oleic	cis-Vaccenic		Elaidic	Oleic
196	146		318	160
228	170		219	315
168	233		137	456
252	243		403	247
212	149		533	135
173			568	250
181			316	134
mAC activity [%] (100% = Gsα stimulation); 20µM fatty acid concentration
mAC9
cis-Vaccenic	Linoleic	Elaidic	Palmitoleic	Oleic	Lauric	Myristic	Palmitic	Linolenic	Arachidonic
239	312	249	224	181.746	459	168	275	172	234
279.333	292	580	275	405.46	133.3	189	152	289	150
383.947	529	459	337	145.967	208	240	163	179	190
557.298	310	277	400	346.678	213.455	185	320	124	172
289.917	679	385.401	284	311	151	310	176	155	188
386.844	363	576	259	255.138	337		184	205	135
556	199	322	336	274.478			239	138
503		216	477	276			184
			306	250.812
				217.882
				184.806
				255.138
				342.385
				164
				447

## Sheet: Figure 5-supplement 1
Figure 5-supplement 1
mAC1 activity (nmol/mg/min)				mAC2 activity (nmol/mg/min)				mAC3 activity (nmol/mg/min)				mAC4 activity (nmol/mg/min)				mAC5 activity (nmol/mg/min)				mAC6 activity (nmol/mg/min)				mAC7 activity (nmol/mg/min)				mAC8 activity (nmol/mg/min)				mAC9 activity (nmol/mg/min)
	basal	Gsα (300nM)			basal	Gsα (300nM)			basal	Gsα (300nM)			basal	Gsα (300nM)			basal	Gsα (300nM)			basal	Gsα (300nM)			basal	Gsα (300nM)			basal	Gsα (300nM)			basal	Gsα (300nM)
	0.13517	0.38755			0.240723	1.04436			0.0307768	0.247282			0.0347571	0.181636			0.0711164	0.473491			0.0422111	0.357564			0.0126209	0.0186026			0.093705	0.365144			0.0798503	1.05212
	0.146658	0.448449			0.212486	2.07167			0.00657075	0.0243835			0.0307881	0.147473			0.032986	0.338646			0.0473522	0.313403			0.0103425	0.0472974			0.0607173	0.246064			0.0909828	1.69967
	0.12234	0.348972			0.486244	2.05542			0.01256	0.0845932			0.00409853	0.169133			0.111071	0.164153			0.100852	0.203147			0.005	0.0322198							0.072683	0.615333
	0.121388	0.531985			0.118658	0.715691			0.0108	0.585663			0.0184118	0.252685			0.0149991	0.636126							0.000163213	0.040532							0.0536821	0.10384
	0.0542293	0.235037			0.15931	1.48964			0.0277479	0.325688							0.0462075	0.659193							0.00374887	0.0442882							0.00552523	0.329764
					0.18914	1.66639			0.00335658	0.276794							0.0447457	0.3605							0.00156485	0.0488613							0.106772	0.518019
					0.149826	0.793867			0.0114582	0.173103							0.0595872	0.880945							0.00999462	0.0815243							0.0454432	0.727402
									0.0275818	0.111565																								1.46625
									0.0221674	0.384163																							0.287877	2.0436
									0.049417	0.147382																							0.0757797	1.02583
									0.03484	0.0907785																							0.106772	0.518019
									0.0108398	0.168986																							0.085	1.815
									0.0238888	0.160926																							0.0825922	0.596759
									0.0411718	0.1618																							0.091163	1.04624
									0.0198051	0.0674531
									0.0148601	0.0823572
									0.0210154	0.103357
									0.0213262	0.0526923
									0.0153307	0.134014
									0.0140848	0.150532
									0.015	0.162
									0.0137992	0.0714619
									0.0200185	0.146564
N	5	5		N	7	7		N	23	23		N	4	4		N	7	7		N	3	3		N	7	7		N	2	2		N	13	14
mean	0.115957	0.390399		mean	0.222341	1.40529		mean	0.0203659	0.170154		mean	0.0220139	0.187732		mean	0.0543875	0.501865		mean	0.0634717	0.291371		mean	0.00620498	0.0447608		mean	0.0772111	0.305604		mean	0.0910863	0.968418
SEM	0.0161125	0.0496378		SEM	0.0465894	0.213902		SEM	0.0023048	0.0262066		SEM	0.00691202	0.022772		SEM	0.0116386	0.0910204		SEM	0.0187489	0.0459171		SEM	0.00181372	0.0072939		SEM	0.0164938	0.0595398		SEM	0.0180509	0.158177

[truncated: 15 more sheets: Figure 5-figure supplement 1, Figure 5-figure supplement 2, Figure 5-figure supplement 3, Figure 5-figure supplement 4, Figure 6, Figure 6-figure supplement 1, Figure 6-figure supplement 2, Figure 6-figure supplement 3, Figure 7, Figure 7-figure supplement 1, Figure 7-figure supplement 2, Figure 8, Figure 9, Figure 10, Figure 11]
