# Supplementary material for: The membrane domains of mammalian adenylyl cyclases are lipid receptors
Source: eLife. 2024 Nov 29;13:RP101483. doi: 10.7554/eLife.101483 (PMC11606603; doi:10.7554/eLife.101483)
Supplement: Figure 4—figure supplement 1—source data 1. [file elife-101483-fig4-figsupp1-data1.xlsx]

## Sheet: Figure 4-figure supplement 1
Figure 4-figure supplement 1
cAMP formation (%)
Isoproterenol (µM)	HEK293-mAC3
0.01	100	100	100
0.1			160
0.5			125
1	80	74	440
2.5	729	899	418
10	850	825	347
100	664	861
