# Supplementary material for: The membrane domains of mammalian adenylyl cyclases are lipid receptors
Source: eLife. 2024 Nov 29;13:RP101483. doi: 10.7554/eLife.101483 (PMC11606603; doi:10.7554/eLife.101483)
Supplement: Figure 4—source data 1. [file elife-101483-fig4-data1.xlsx]

## Sheet: Figure 4
Figure 4
AC activity (%); 100%= 2.5µM Isoproterenol stimulation
Oleic acid (µM)	HEK-mAC3
0.001	100	100	100	100	100	100	100	100	100	100	100	100	100
0.01							132			100		105
0.03							102			145		87
0.06							103			118		89
0.1							118	127	150	122		108
0.3								130	163
0.5	140	92
0.6							101	113	161	135		121
1	152	114	158	176	139	123		120	184	106
3	190	109	191	198	119	107
6	178	111	149	195	140	108	115	126	178	112		146
10	199	123	137	198	118	119
20	178	136					136	96	201	147	164	163	150
50				187	186	134
AC activity (%); 100%= 2.5µM Isoproterenol stimulation
Oleic acid (µM)	HEK-mAC5
20	107	100	135
