# Supplementary material for: The membrane domains of mammalian adenylyl cyclases are lipid receptors
Source: eLife. 2024 Nov 29;13:RP101483. doi: 10.7554/eLife.101483 (PMC11606603; doi:10.7554/eLife.101483)
Supplement: Figure 5—source data 1. [file elife-101483-fig5-data1.xlsx]

## Sheet: Figure 5
Figure 5
Figure 5 A										Figure 5 B
mAC activity [%] (100% = 300nM Gsα stimulation); 20µM Oleic acid concentration										activity [%] (100% = 300nM Gsα stimulation)
mAC1	mAC2	mAC3	mAC4	mAC5	mAC6	mAC7	mAC8	mAC9		Oleic acid (µM)	mAC2
75	196	341	92	105	92	160	134	181.746		0.3	100	100	100	100	100	100	100
44	228	237	64	93	80	315	139	405.46		1	98	100	116.946				86.6241
53	168	237	100	117	133	456		145.967		3	82	99	116.404				106.721
97	252	181	72	135		247		346.678		6	120	95	119.011		162	109.973	86.7599
68.0697	212	452		138		135		311		10	157	167	142	171	162	123	123
	173	464		161		250		255.138		20	196	228	168	252	212	173	181
	181	265		84		134		274.478
		265						276
		137						250.812		activity [%] (100% = 300nM Gsα stimulation)
		226						217.882		Oleic acid (µM)	mAC7
		348						184.806		0.3	100	100	100	100	100	100	100
		429						255.138		1	51	161	134	148	79	102	135
		323						342.385		3	77	199	127	215	64	110	62
		298						164		6	161	180		113	95	227	58
		430						447		10	114	257	315	204	115	147
		264								20	160	315	456	247	135	250	134
		322
		395
		341								activity [%] (100% = 300nM Gsα stimulation)
		532								Oleic acid (µM)	mAC9
		253								0.3	100	100	100	100	100	100	100	100	100	100	100
		428								1	115.024	88.1834	114.341	100.1	127.56	107.082	128.251	111.522	116.201	179.231	108.752	107.082		116	154
		297								3		59.0668	150.293	151.49	140.098	125.604	141.557	129.889	134.351	178.987	111.151	125.604		142	226
										6	144.921	157.549	176.953	138.334	151.883	237.827	151.212	215.669	161.941	129.566	178.845	237.827		137	173
										10	316.495	79.7108	312.059	189.114	169	180.889	216.348	203	202.436	200.479	171.191	180.889	259.025	140	418
										20	181.746	405.46	145.967	346.678	311	255.138	274.478	276	250.812	217.882	184.806	255.138	342.385	164	447
Figure 5 C
mAC activity [%] (100% = 300nM Gsα stimulation); 20µM fatty acid concentration
mAC2			mAC7
Oleic	cis-Vaccenic		Elaidic	Oleic
196	146		318	160
228	170		219	315
168	233		137	456
252	243		403	247
212	149		533	135
173			568	250
181			316	134
mAC activity [%] (100% = Gsα stimulation); 20µM fatty acid concentration
mAC9
cis-Vaccenic	Linoleic	Elaidic	Palmitoleic	Oleic	Lauric	Myristic	Palmitic	Linolenic	Arachidonic
239	312	249	224	181.746	459	168	275	172	234
279.333	292	580	275	405.46	133.3	189	152	289	150
383.947	529	459	337	145.967	208	240	163	179	190
557.298	310	277	400	346.678	213.455	185	320	124	172
289.917	679	385.401	284	311	151	310	176	155	188
386.844	363	576	259	255.138	337		184	205	135
556	199	322	336	274.478			239	138
503		216	477	276			184
			306	250.812
				217.882
				184.806
				255.138
				342.385
				164
				447
