# Supplementary material for: The membrane domains of mammalian adenylyl cyclases are lipid receptors
Source: eLife. 2024 Nov 29;13:RP101483. doi: 10.7554/eLife.101483 (PMC11606603; doi:10.7554/eLife.101483)
Supplement: Figure 6—source data 1. [file elife-101483-fig6-data1.xlsx]

## Sheet: Figure 6
Figure 6
Figure 6 A
activity [%] (100% = 300nM Gsα stimulation)
Arachidonic acid (µM)	mAC1
0.1	100	100	100	100	100	100	100	100	100	100	100	100	100	100
1	77.572			99	147.453	81	114	90.1534	93	113		113	142	83
3	114.064			113	116.891	79	148	87.6169	82			98	95	75
6	83.7702		80	96	100	86	114	97	86	119
10	87	94	95	89		76	99	73	59	83	78	107	95	85
20	36	81	44	69		66		27	22	58	76
25	40	63	18	34	63	48	44
30												58	69	46
60												12	11	12
100												12	2	3
activity [%] (100% = 300nM Gsα stimulation)
Arachidonic acid (µM)	mAC4
0.1	100	100	100	100	100	100	100	100	100	100
1	68.3225			85	103.03	89	87	67	75	108
3	72.2945			69	73.3733	97	106	108	72	95
6	69.9487		85	107	83	91	126
10	41	70	72	71	72	72	93	47	80	102
20	29	47	24	60	52	53
25	14	50	19	46			45
30								74	88	84
60								19	1	25
100								14	13	22
Figure 6 B
cAMP level (%); 100%= 10µM Isoproterenol stimulation
Arachidonic acid (µM)	HEK-mAC1
1e-06	100	100	100	100	100	100	100	100	100
1e-05								113	69
0.0001								98	73
0.001								93	69
0.003									61
0.006									59
0.01		62				55	52	91	64
0.03
0.06
0.1		77				55	49	97	63
0.6						47
1	101	69	82	43	46	39	50	89	65
3	93		76	45	44	50	46
10	87	95	88	43	46	55	43	92
30	90		72	44	48		49
60	72		67	51	53		65
100	76	47	57	42	44		60	81
cAMP level (%); 100%= 10µM Isoproterenol stimulation
Arachidonic acid (µM)	HEK-mAC4
1e-06	100	100	100	100	100	100	100	100
1e-05								136
0.0001								111
0.001								114
0.003
0.006
0.01		81				101	120	122
0.03						124
0.06						102
0.1		84				94	116	103
0.6						108
1	106	107	121	127	99	109	161	110
3	93		101	129	97	124	139
10	112	82	111	109	125	111	147	111
30	103		112	97	105		131
60	95		112	121	114		128
100	99	78	112	85	100		146	145
