# Supplementary material for: The membrane domains of mammalian adenylyl cyclases are lipid receptors
Source: eLife. 2024 Nov 29;13:RP101483. doi: 10.7554/eLife.101483 (PMC11606603; doi:10.7554/eLife.101483)
Supplement: Figure 7—source data 1. [file elife-101483-fig7-data1.xlsx]

## Sheet: Figure 7
Figure 7
Figure 7 A
activity [%] (100% = 300nM Gsα stimulation)
Anandamide (µM)	mAC5
0.1	100	100	100	100	100	100	100	100	100	100	100	100	100	100	100	100	100	100	100	100	100	100	100	100	100	100	100	100	100	100	100	100
0.5		96	115	93	114	127
1		93	61	114	124	115	130	111	143		97	117		85	140		108	104	105	113	82	83	106	94			133	81	96	77	91	85
3		65	153	122	128	95	110	102	126		106	102		110	199		117	100	88	135	77	77	63	110			122	68	102	95	109	107
6		100	105	65	102	95								74	139		103	116	110	132	95	113		94
8																								101
10	87	90	39	90	106	94	95	111	113		99	99	46	52	146	87	100	86	114	119	83	100	86	72			145	80	90	87	115	80
20	84	100	135	56	95	103				83			46	25	95	90	83	70	88	138	88	81		68
25													18	45	76	88	98
30							82	83	94		77	96											71	71		106	63	69	85	94	92	78
35																		78	77	119
40																					58	74
60							78	68	72		74	77											66	46			62	37	35	58	71	54
80																								47
100							55	58	70	40	56	45											43	33	55	69	40	34	31	58	65	60
activity [%] (100% = 300nM Gsα stimulation)
Anandamide (µM)	mAC6
0.1	100	100	100	100	100	100	100	100	100	100	100	100	100	100	100	100
0.5	100	94
1		89			109	143		140	89	116	104	135			69	113
3	135	85			145	116		148	68	136	120	76			73	97
6	76	70			140	131		245	95	121	131	106
10	106	77		71	120	106	88	134	98	97	141	90			79	155
20	90	49	67	38	26	86	57	79	89	89	85	88
25	88			44	49	17	75	85
30												60	59	57	63	40
35									73
60												27			44	71
100	27		26							40	33	32	18	26	51	30
Figure 7 B									Figure 7 C
activity [%] (100% = 300nM Gsα stimulation)									cAMP level (pmol cAMP/10000cells); stimulated by 2.5µM Isoproterenol
Anandamide (µM)	mAC1								HEK-mAC5
0.1	100	100	100		100	100			control	anandamide
1	81	83	116		100	88			2.418	1.863
3	98	83	114		101	97				1.488
10	92	80	101		94	81			2.414	1.982
30	41	63	74		78	71			1.348	1.229
60	39	40	53		59	57			1.691	1.334
100	21	38	63	27	52	50			4.145	3.562
activity [%] (100% = 300nM Gsα stimulation)
Anandamide (µM)	mAC4
0.1	100	100	100		100	100
1	67	95	105		135	81
3	86	113	96		121	82
10	59	94	137		111	73
30	42	107	107		124	68
60	16	77	93		127	102
100	6	70	114	36	125	87
