# Supplementary material for: The membrane domains of mammalian adenylyl cyclases are lipid receptors
Source: eLife. 2024 Nov 29;13:RP101483. doi: 10.7554/eLife.101483 (PMC11606603; doi:10.7554/eLife.101483)
Supplement: Figure 8—source data 1. [file elife-101483-fig8-data1.xlsx]

## Sheet: Figure 8
Figure 8
mAC8 activity [%] (100% = 300nM Gsα stimulation); 20µM fatty acid concentration
Lauric	Myristic	Myristoleic	Palmitic	Palmitoleic	Stearic	9-HSA	Oleic	Elaidic	cis-Vaccenic	Oleamide	Me-Oleate	Octadecane	Octadecane-(COOH)2	Linoleic	Linolenic	Arachidonic	EPA
80	119	62	163	116	107	67	134	63	107	104	123	129	54	119	70	90	235
69.0384	130	117	69	103.131	102	108	139	39	123	74	58	109	114	212	196	106	112
	99	101	108	76				108					90	115	157	87	152
			100.49											129			118
