# Supplementary material for: The membrane domains of mammalian adenylyl cyclases are lipid receptors
Source: eLife. 2024 Nov 29;13:RP101483. doi: 10.7554/eLife.101483 (PMC11606603; doi:10.7554/eLife.101483)
Supplement: Figure 9—source data 3. [file elife-101483-fig9-data3.xlsx]

## Sheet: Figure 9
Figure 9
Figure 9 B
Gsα (nM)	mAC5-3 activity [cAMP nmol/mg/min]
1	0.02	0.021	0.023
10	0.025	0.052	0.015
50	0.053	0.088	0.088
100	0.087	0.11	0.096
300	0.202	0.129	0.227
600		0.203	0.309
800	0.475	0.53	0.355
1000	0.601	0.728	0.447
Figure 9 C				Figure 9 D				Figure 9 E
activity [%] (100% = 300nM Gsα stimulation); 20µM Oleic acid concentration				activity [%] (100% = 300nM Gsα stimulation); 100µM Anandamide concentration				activity [%] (100% = 300nM Gsα stimulation)
mAC3	mAC5	mAC 5-3		mAC3	mAC5	mAC 5-3		Anandamide (µM)	mAC3
240	161	123		93	55	41		0.1	100	100	100	100	100	100	100	100	100	100
171	84	131		49	58	69		1	77	87	87	101	117	100		94	127
162	105	115		84	70	72		3	90	84	91	72	119	113		114	146
317	93	112		165	40	65		10	112	137	105	80	130	120		88	111
241	117	78		95	56	48		30	100	101	96	65	85	72		94	68
298	135	100		79	45	42		60	82	95	68	49	68	64		62	30
305	138	90		61	58			100	93	49	84		95	79	136	61	42	165
264		172		42	65
343		112		165	60
261								Anandamide (µM)	mAC5
341								0.1	100	100	100	100	100	100	100	100	100	100	100	100	100	100	100	100	100	100	100	100	100	100	100	100	100	100	100	100	100	100	100	100
237								0.5		96	115	93	114	127
237								1		93	61	114	124	115	130	111	143		97	117		85	140		108	104	105	113	82	83	106	94			133	81	96	77	91	85
181								3		65	153	122	128	95	110	102	126		106	102		110	199		117	100	88	135	77	77	63	110			122	68	102	95	109	107
452								6		100	105	65	102	95								74	139		103	116	110	132	95	113		94
464								8																								101
265								10	87	90	39	90	106	94	95	111	113		99	99	46	52	146	87	100	86	114	119	83	100	86	72			145	80	90	87	115	80
265								20	84	100	135	56	95	103				83			46	25	95	90	83	70	88	138	88	81		68
137								25													18	45	76	88	98
226								30							82	83	94		77	96											71	71		106	63	69	85	94	92	78
348								35																		78	77	119
429								40																					58	74
323								60							78	68	72		74	77											66	46			62	37	35	58	71	54
430								80																								47
264								100							55	58	70	40	56	45											43	33	55	69	40	34	31	58	65	60
322
395
298								Anandamide (µM)	mAC5-3
341								0.1	100	100	100	100	100	100
532								1	130	123	126	93	106	127
253								3	144	129	121	102	118	146
428								10	132	115	109	100	102	111
297								30	88	74	77	70	88	68
								60	72	82	59	77	75	30
								100	41	69	72	65	48	42
