# Supplementary material for: The membrane domains of mammalian adenylyl cyclases are lipid receptors
Source: eLife. 2024 Nov 29;13:RP101483. doi: 10.7554/eLife.101483 (PMC11606603; doi:10.7554/eLife.101483)
Supplement: Figure 10—source data 1. [file elife-101483-fig10-data1.xlsx]

## Sheet: Figure 10
Figure 10
HEK-mAC activity (%); 100%= 2.5µM Isoproterenol stimulation
Anandamide [µM]	HEK-mAC5
0.1	100	100	100	100	100	100	100	100	100	100
1	110	105	81	111	118	98	96	86
3	110	102	100	93	132
10	108	103	116	87	120	105	102	102
30	100	98	88	95	102
60	95	75	88	93	110
100		86	79		94	77	62	71	71	79
Anandamide [µM]	HEK-mAC5-3
0.1	100	100	100	100
1	129	104	165	104
3	128	100	115	94
10	122	107	89	107
30	99	89	102	66
60	64	59	77	41
100	41	43	26	26
