# Supplementary material for: The membrane domains of mammalian adenylyl cyclases are lipid receptors
Source: eLife. 2024 Nov 29;13:RP101483. doi: 10.7554/eLife.101483 (PMC11606603; doi:10.7554/eLife.101483)
Supplement: Figure 11—source data 1. [file elife-101483-fig11-data1.xlsx]

## Sheet: Figure 11
Figure 11
mAC activity [%] (100% = 300nM Gsα stimulation)
Oleic acid (µM)	mouse brain cortex
0.5	100	100	100	100	100	100
1	106.336	122	77.9493	92.8415	114	131
3	119.249	104	101.952	100.449	102	154
6	152.514	124	143.529	121		110
8	173	128	146	123	126	174
10		136	105	142		181
20	138	129		187	161	140
