# Supplementary figures and images for: The membrane domains of mammalian adenylyl cyclases are lipid receptors
Source: eLife journal article supplement (doi:10.7554/elife.101483), 2024-10-01

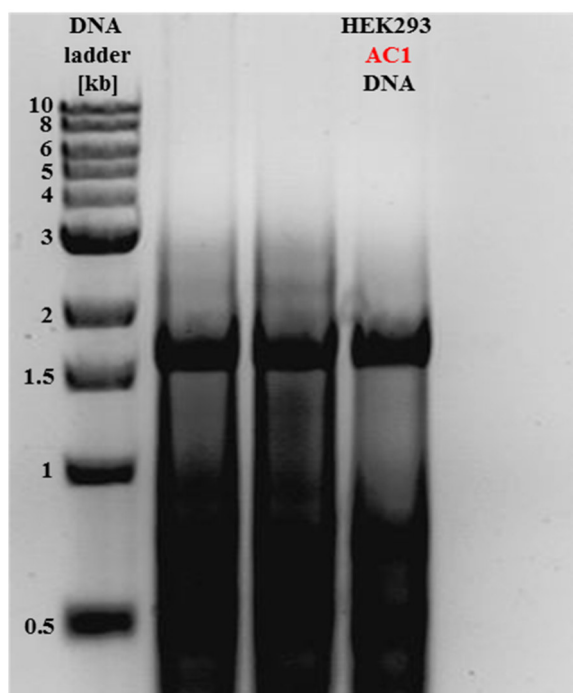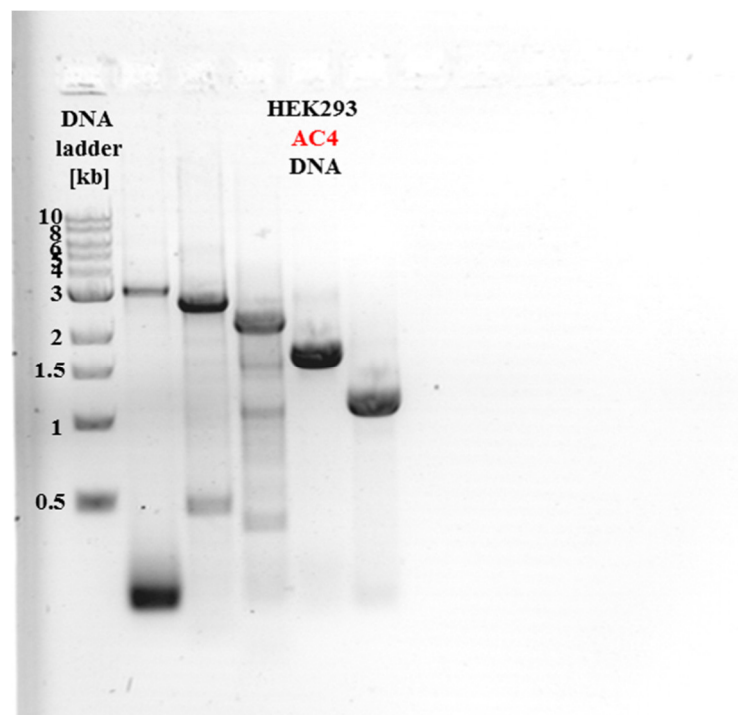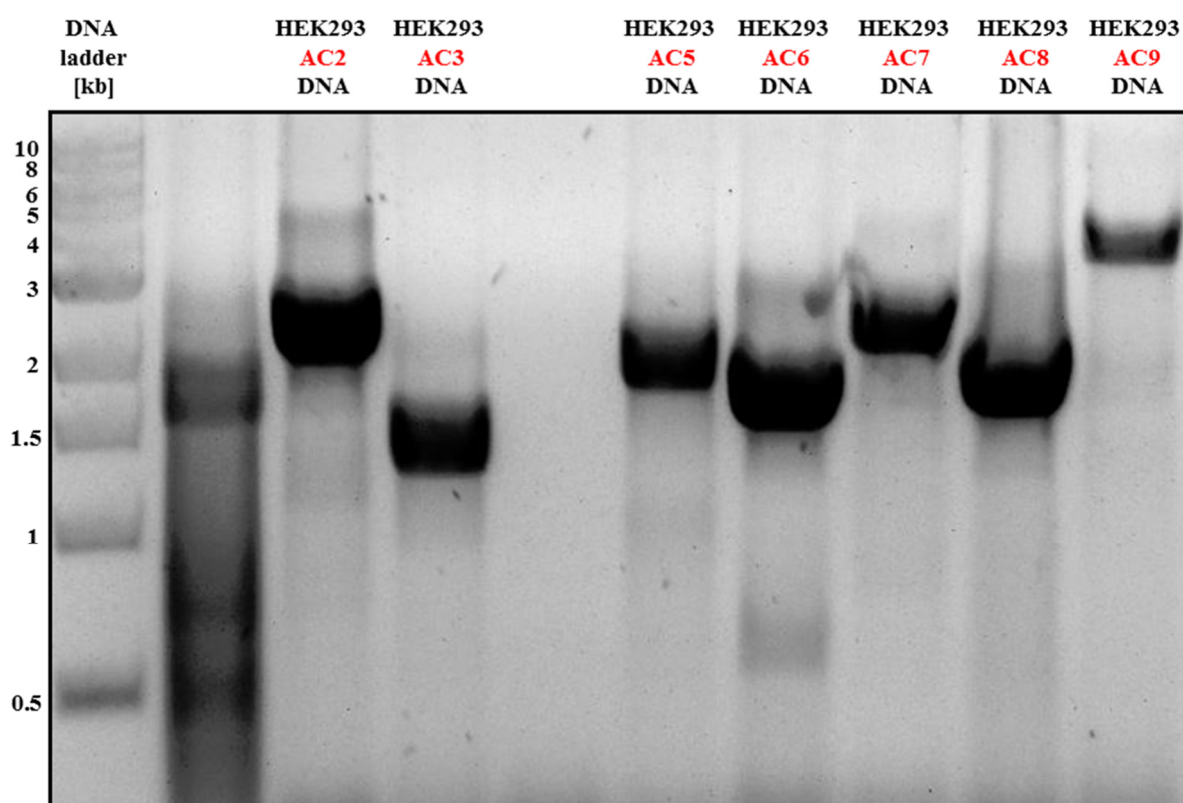

Supplement: fig4-figsupp2-data1 [file elife-101483-fig4-figsupp2-data1-v1.zip]

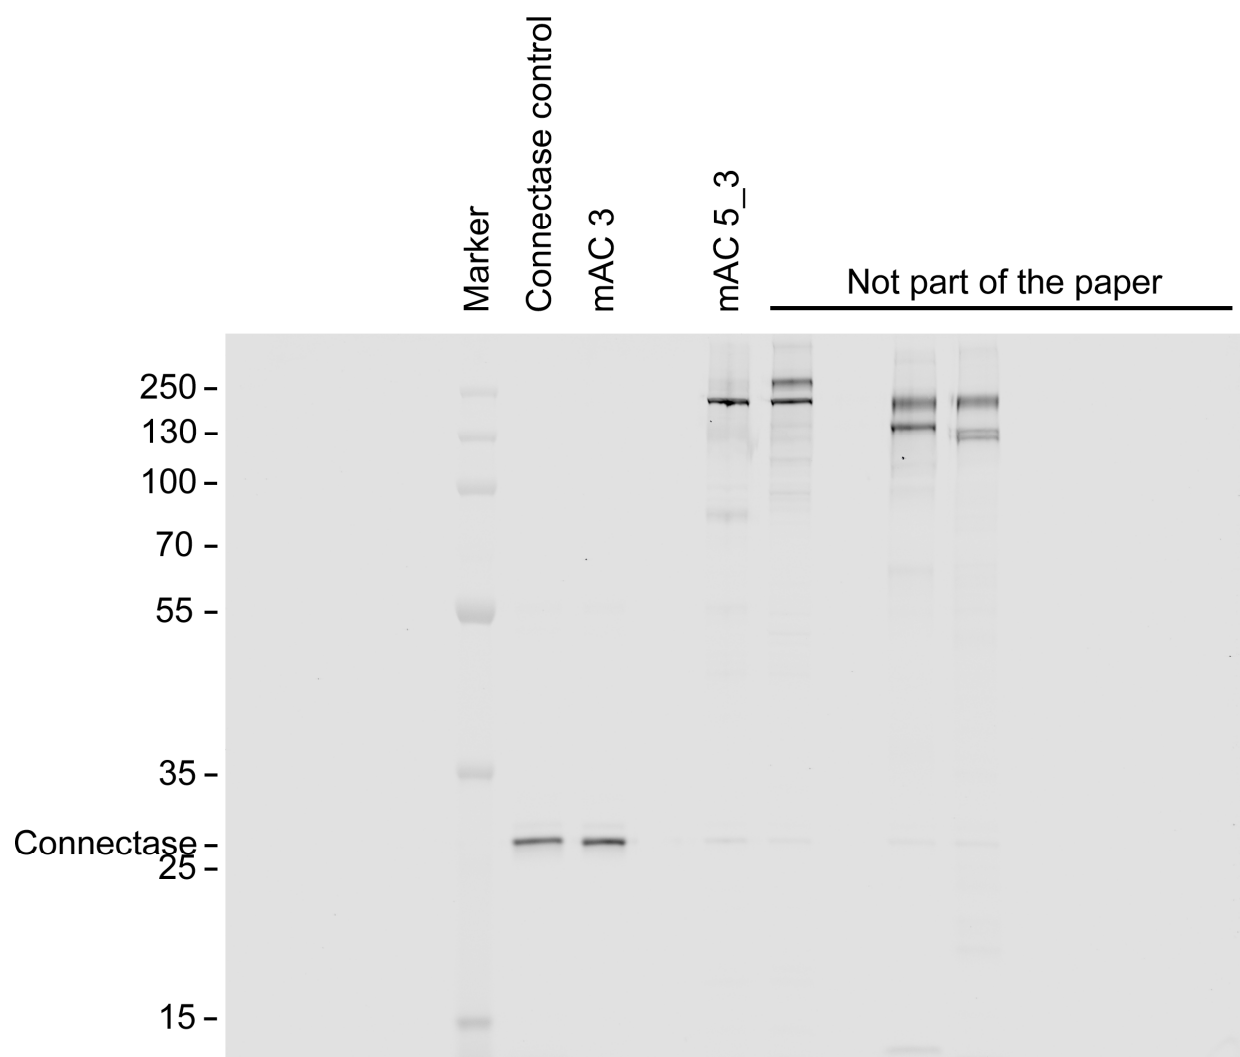

Supplement: fig9-data1 [file elife-101483-fig9-data1-v1.zip]
